# Supplementary material for: Prediction of Oncogenic Interactions and Cancer-Related Signaling Networks Based on Network Topology
Source: PubMed Central journal article supplement (PMC3808429; doi:10.1371/journal.pone.0077521), 2013-10-25

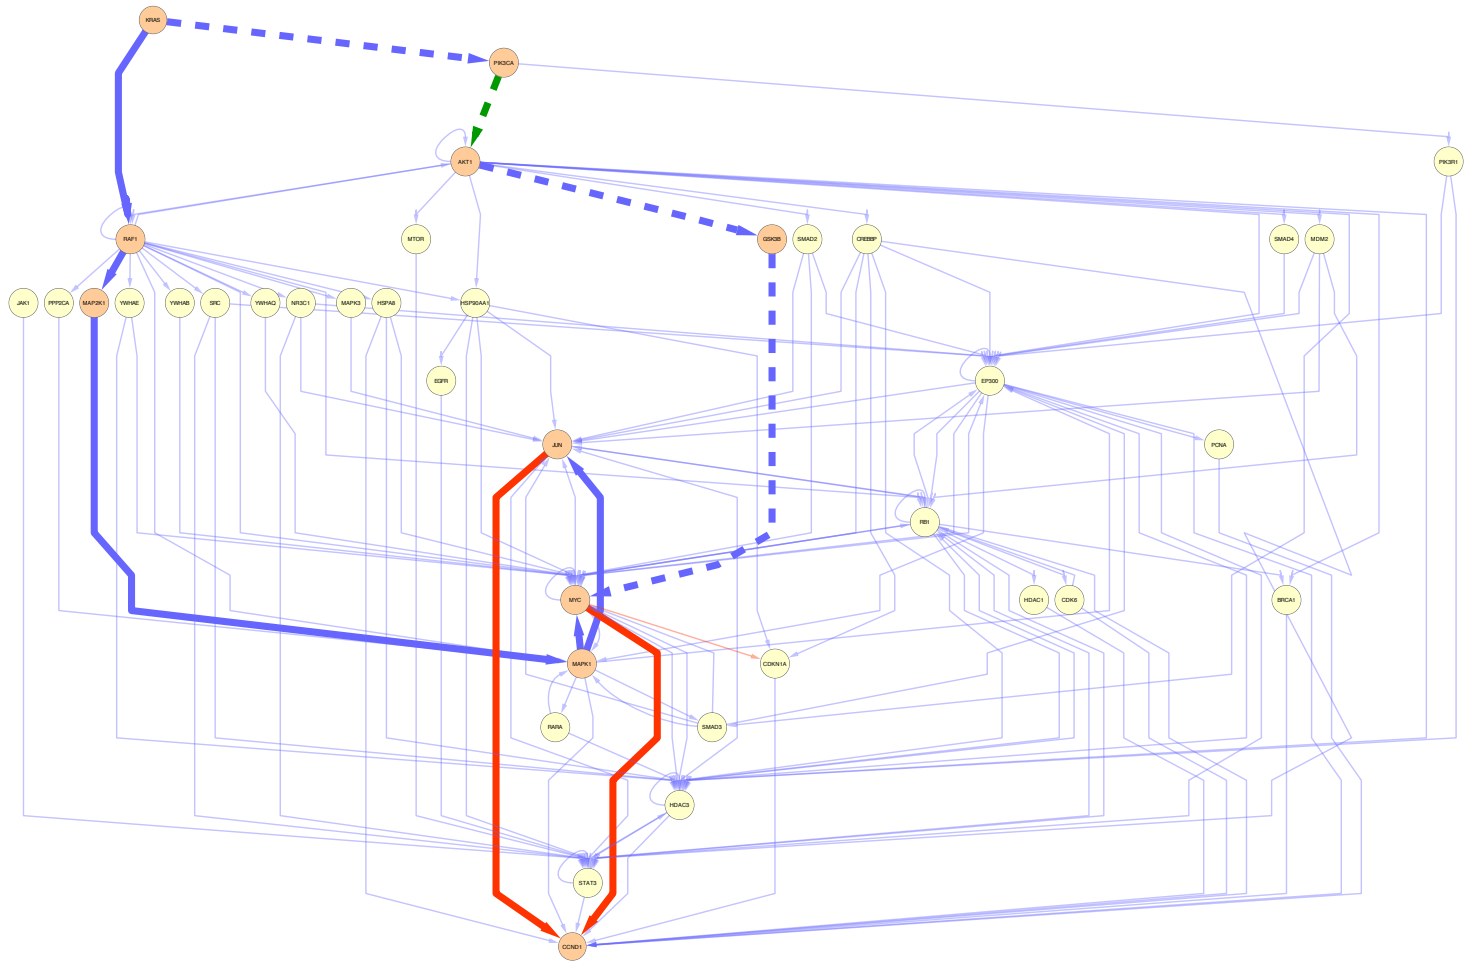

Supplement: pone.0077521.s002.pdf [file pone.0077521.s002.pdf]
