# Supplementary material for: Prediction of Oncogenic Interactions and Cancer-Related Signaling Networks Based on Network Topology
Source: PubMed Central journal article supplement (PMC3808429; doi:10.1371/journal.pone.0077521), 2013-10-25
Supplement: pone.0077521.s005.pdf [file pone.0077521.s005.pdf]

Supplementary\_Table\_S1

| Oncogenic linear pathway<br>(initial gene -> target gene) | Cancer type<br>(KEGG Pathway code)   | Oncogenic linear pathway size<br>(number of interactions) | Subnetwork size<br>(number of interactions) | Recall*<br>(%) |
|-----------------------------------------------------------|--------------------------------------|-----------------------------------------------------------|---------------------------------------------|----------------|
| PTEN -> TP53                                              | Prostate cancer (hsa5215)            | 3                                                         | 275                                         | 100            |
| PTEN -> NFKB1                                             | Prostate cancer (hsa5215)            | 4                                                         | 411                                         | 100            |
| PTEN -> LEF1                                              | Prostate cancer (hsa5215)            | 4                                                         | 2353                                        | 100            |
| PDGFB -> MTOR                                             | Glioma (hsa5214)                     | 4                                                         | 2652                                        | 100            |
| NRAS -> MAPK3                                             | Melanoma (hsa5218)                   | 3                                                         | 13                                          | 100            |
| NRAS -> MAPK1                                             | Melanoma (hsa5218)                   | 3                                                         | 164                                         | 100            |
| KRAS -> RPS6KB1                                           | Acute myeloid leukemia (hsa5221)     | 4                                                         | 10                                          | 100            |
| KRAS -> NFKB1                                             | Pancreatic cancer (hsa5212)          | 4                                                         | 389                                         | 100            |
| KRAS -> IKBKB                                             | Acute myeloid leukemia (hsa5221)     | 3                                                         | 11                                          | 100            |
| KRAS -> ELK1                                              | Endometrial cancer (hsa5213)         | 4                                                         | 577                                         | 100            |
| KRAS -> EIF4EBP1                                          | Acute myeloid leukemia (hsa5221)     | 4                                                         | 15                                          | 100            |
| KRAS -> CCND1                                             | Colorectal cancer (hsa5210)          | 5                                                         | 134                                         | 100            |
| KRAS -> BCL2L1                                            | Pancreatic cancer (hsa5212)          | 4                                                         | 1203                                        | 100            |
| KRAS -> BAD                                               | Non-small cell lung cancer (hsa5223) | 3                                                         | 23                                          | 100            |
| KIT -> RPS6KB1                                            | Acute myeloid leukemia (hsa5221)     | 4                                                         | 605                                         | 100            |
| KIT -> MAPK3                                              | Acute myeloid leukemia (hsa5221)     | 6                                                         | 2686                                        | 100            |
| KIT -> IKBKB                                              | Acute myeloid leukemia (hsa5221)     | 3                                                         | 1259                                        | 100            |
| KIT -> EIF4EBP1                                           | Acute myeloid leukemia (hsa5221)     | 4                                                         | 3051                                        | 100            |
| KIT -> BAD                                                | Acute myeloid leukemia (hsa5221)     | 3                                                         | 182                                         | 100            |
| HRAS -> MAPK3                                             | Bladder cancer (hsa5219)             | 3                                                         | 3273                                        | 100            |
| HRAS -> MAPK1                                             | Bladder cancer (hsa5219)             | 3                                                         | 35                                          | 100            |
| FLT3 -> RPS6KB1                                           | Acute myeloid leukemia (hsa5221)     | 4                                                         | 678                                         | 100            |
| FLT3 -> IKBKB                                             | Acute myeloid leukemia (hsa5221)     | 3                                                         | 1729                                        | 100            |
| ERBB2 -> VEGFA                                            | Pancreatic cancer (hsa5212)          | 3                                                         | 24                                          | 100            |
| EGFR -> MTOR                                              | Glioma (hsa5214)                     | 3                                                         | 1202                                        | 100            |
| CDKN2A -> E2F3                                            | Glioma (hsa5214)                     | 6                                                         | 440                                         | 100            |
| CDKN2A -> E2F2                                            | Glioma (hsa5214)                     | 6                                                         | 885                                         | 100            |
| CDKN2A -> E2F1                                            | Glioma (hsa5214)                     | 6                                                         | 844                                         | 100            |
| CDKN1B -> E2F3                                            | Prostate cancer (hsa5215)            | 3                                                         | 2888                                        | 100            |
| CDKN1B -> E2F2                                            | Prostate cancer (hsa5215)            | 3                                                         | 487                                         | 100            |
| CDKN1B -> E2F1                                            | Prostate cancer (hsa5215)            | 3                                                         | 306                                         | 100            |
| ABL1 -> CDKN1B                                            | Chronic myeloid leukemia (hsa5220)   | 4                                                         | 1820                                        | 100            |
| FLT3 -> MAPK3                                             | Acute myeloid leukemia (hsa5221)     | 6                                                         | 2199                                        | 83             |
| ABL1 -> MAPK3                                             | Chronic myeloid leukemia (hsa5220)   | 5                                                         | 1099                                        | 80             |
| PDGFB -> MAPK3                                            | Glioma (hsa5214)                     | 8                                                         | 1548                                        | 75             |
| PDGFB -> MAPK1                                            | Glioma (hsa5214)                     | 8                                                         | 759                                         | 75             |
| PDGFA -> MAPK3                                            | Glioma (hsa5214)                     | 8                                                         | 2203                                        | 75             |
| FLT3 -> EIF4EBP1                                          | Acute myeloid leukemia (hsa5221)     | 4                                                         | 169                                         | 75             |
| EGFR -> MAPK3                                             | Glioma (hsa5214)                     | 7                                                         | 3005                                        | 71             |
| PDGFA -> MTOR                                             | Glioma (hsa5214)                     | 4                                                         | 17                                          | 50             |
| KRAS -> MYC                                               | Colorectal cancer (hsa5210)          | 4                                                         | 10                                          | 50             |
| FLT3 -> BAD                                               | Acute myeloid leukemia (hsa5221)     | 7                                                         | 12                                          | 43             |
| PTEN -> CCND1                                             | Small cell lung cancer (hsa5222)     | 5                                                         | 473                                         | 40             |

Supplementary\_Table\_S1

|                |                                    |   |     |    |
|----------------|------------------------------------|---|-----|----|
| PTEN -> BIRC3  | Small cell lung cancer (hsa5222)   | 5 | 500 | 40 |
| MET -> JUN     | Renal cell carcinoma (hsa5211)     | 7 | 116 | 29 |
| EGFR -> MAPK1  | Glioma (hsa5214)                   | 7 | 988 | 29 |
| ABL1 -> TP53   | Chronic myeloid leukemia (hsa5220) | 5 | 17  | 20 |
| ABL1 -> MAPK1  | Chronic myeloid leukemia (hsa5220) | 5 | 20  | 20 |
| KIT -> MAPK1   | Acute myeloid leukemia (hsa5221)   | 6 | 48  | 17 |
| FLT3 -> MAPK1  | Acute myeloid leukemia (hsa5221)   | 6 | 30  | 17 |
| ABL1 -> NFKB1  | Chronic myeloid leukemia (hsa5220) | 6 | 18  | 17 |
| PDGFA -> MAPK1 | Glioma (hsa5214)                   | 8 | 35  | 13 |

\* Ratio between the number of interactions of the OLP in the subnetwork and the actual number of interactions in OLP

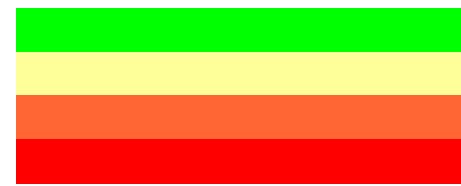

Recall = 100%  
 100% > Recall > 49%  
 50% > Recall > 25%  
 Recall < 25%
